# Supplementary material
Source: PubMed Central journal article supplement (PMC10152502)
Supplement: jiac108_suppl_supplementary_appendix.pdf [file jiac108_suppl_supplementary_appendix.pdf]

## Supplementary material

### Table of Contents

|                                                                                                                                                               |           |
|---------------------------------------------------------------------------------------------------------------------------------------------------------------|-----------|
| <b><i>Supplementary Tables</i></b> .....                                                                                                                      | <b>2</b>  |
| <b>Supplementary Table S1. Characteristics of included 26 studies.</b> .....                                                                                  | <b>2</b>  |
| <b><i>Supplementary Figures</i></b> .....                                                                                                                     | <b>4</b>  |
| <b>Supplementary Figure S1. Study identification.</b> .....                                                                                                   | <b>4</b>  |
| <b>Supplementary Figure S2. Age-specific prevalence of anal and cervical non-16 HR-HPV infection in HIV-negative women and women with HIV.</b> .....          | <b>5</b>  |
| <b>Supplementary Figure S3. Age-specific prevalence of anal and cervical 2v-, 4v-, and 9v-HPV infection in HIV-negative women and women with HIV.</b> .....   | <b>9</b>  |
| <b>Supplementary Figure S4. Percentage of women with HIV according to current CD4 and age group.</b> .....                                                    | <b>10</b> |
| <b>Supplementary Figure S5. Combination of cervical and anal non-HPV16 prevalence in HIV-negative women and women with HIV, according to age group.</b> ..... | <b>11</b> |
| <b><i>References</i></b> .....                                                                                                                                | <b>15</b> |

## Supplementary Tables

**Supplementary Table S1. Characteristics of included 26 studies.**

| Study                                    | Country                   | Number of women with both anal and cervical HPV16 results |     |         | Number of women with both anal and cervical cytopathological results <sup>a</sup> |     |         |
|------------------------------------------|---------------------------|-----------------------------------------------------------|-----|---------|-----------------------------------------------------------------------------------|-----|---------|
|                                          |                           | HIV-negative women                                        | WWH | Overall | HIV-negative women                                                                | WWH | Overall |
| Duan et al (2021) [1]                    | China                     | 0                                                         | 409 | 409     | 0                                                                                 | 409 | 409     |
| Morhason-Bello et al (2021) [2]          | Nigeria                   | 291                                                       | 7   | 298     | 0                                                                                 | 0   | 0       |
| Rodrigues et al (2019) [3]               | Brazil                    | 112                                                       | 41  | 153     | 0                                                                                 | 0   | 0       |
| de Pokomandy et al (2017) [4]            | Canada                    | 0                                                         | 149 | 149     | 0                                                                                 | 136 | 136     |
| Dube Mandishora et al (2017) [5]         | Zimbabwe                  | 74                                                        | 69  | 143     | 0                                                                                 | 0   | 0       |
| Wei et al (2018) [6] <sup>b</sup>        | China                     | 2281                                                      | 0   | 2281    | 0                                                                                 | 0   | 0       |
| Heard et al (2016) [7]                   | France                    | 0                                                         | 311 | 311     | 0                                                                                 | 141 | 141     |
| Menezes et al (2016) [8]                 | India                     | 0                                                         | 46  | 46      | 0                                                                                 | 0   | 0       |
| Ortiz et al (2016) [9]                   | Puerto Rico               | 535                                                       | 0   | 535     | 0                                                                                 | 0   | 0       |
| Cambou et al (2015) [10]                 | Brazil                    | 0                                                         | 457 | 457     | 0                                                                                 | 456 | 456     |
| Ramautarsing et al (2015) [11]           | Thailand                  | 0                                                         | 90  | 90      | 0                                                                                 | 84  | 84      |
| Tso et al (2015) [12]                    | Brazil                    | 0                                                         | 42  | 42      | 0                                                                                 | 42  | 42      |
| Godbole et al (2014) [13]                | India                     | 0                                                         | 97  | 97      | 0                                                                                 | 0   | 0       |
| Kojic et al (2014) [14]                  | USA; Brazil; South Africa | 0                                                         | 287 | 287     | 0                                                                                 | 0   | 0       |
| Moscicki et al (2014) [15]               | USA                       | 88                                                        | 1   | 89      | 0                                                                                 | 0   | 0       |
| Remis et al (2013) [16]                  | Canada                    | 291                                                       | 126 | 417     | 0                                                                                 | 0   | 0       |
| Hernandez et al (2013) [17] <sup>b</sup> | USA                       | 187                                                       | 0   | 187     | 0                                                                                 | 0   | 0       |
| Hessol et al (2013) [18]                 | USA                       | 150                                                       | 386 | 536     | 137                                                                               | 330 | 467     |
| Mullins et al (2013) [19]                | USA                       | 103                                                       | 188 | 291     | 0                                                                                 | 0   | 0       |
| Ortiz et al (2013) [20]                  | Puerto Rico               | 99                                                        | 0   | 99      | 0                                                                                 | 0   | 0       |

| Study                                    | Country    | Number of women with both anal and cervical HPV16 results |      |         | Number of women with both anal and cervical cytopathological results <sup>a</sup> |      |         |
|------------------------------------------|------------|-----------------------------------------------------------|------|---------|-----------------------------------------------------------------------------------|------|---------|
|                                          |            | HIV-negative women                                        | WWH  | Overall | HIV-negative women                                                                | WWH  | Overall |
| Castro et al (2012) [21] <sup>b</sup>    | Costa Rica | 2107                                                      | 0    | 2107    | 0                                                                                 | 0    | 0       |
| Kojic et al (2011) [22]                  | USA        | 0                                                         | 152  | 152     | 0                                                                                 | 130  | 130     |
| Goncalves et al (2008) [23]              | Brazil     | 0                                                         | 102  | 102     | 0                                                                                 | 0    | 0       |
| Hernandez et al (2005) [24] <sup>b</sup> | USA        | 1582                                                      | 0    | 1582    | 0                                                                                 | 0    | 0       |
| Moscicki et al (2003) [25]               | USA        | 0                                                         | 188  | 188     | 0                                                                                 | 0    | 0       |
| Palefsky et al (2001) [26]               | USA        | 0                                                         | 129  | 129     | 0                                                                                 | 124  | 124     |
| Overall                                  |            | 7900                                                      | 3277 | 11177   | 137                                                                               | 1852 | 1989    |

Abbreviation: HPV, human papillomavirus; WWH, women with HIV.

<sup>a</sup>Only including studies that tested all 13 high-risk HPV types.

<sup>b</sup>These studies were deemed to be the population-based studies for which women were assumed to be HIV-negative, even in the absence of such information at an individual level, as we did before [27].

## Supplementary Figures

Supplementary Figure S1. Study identification.

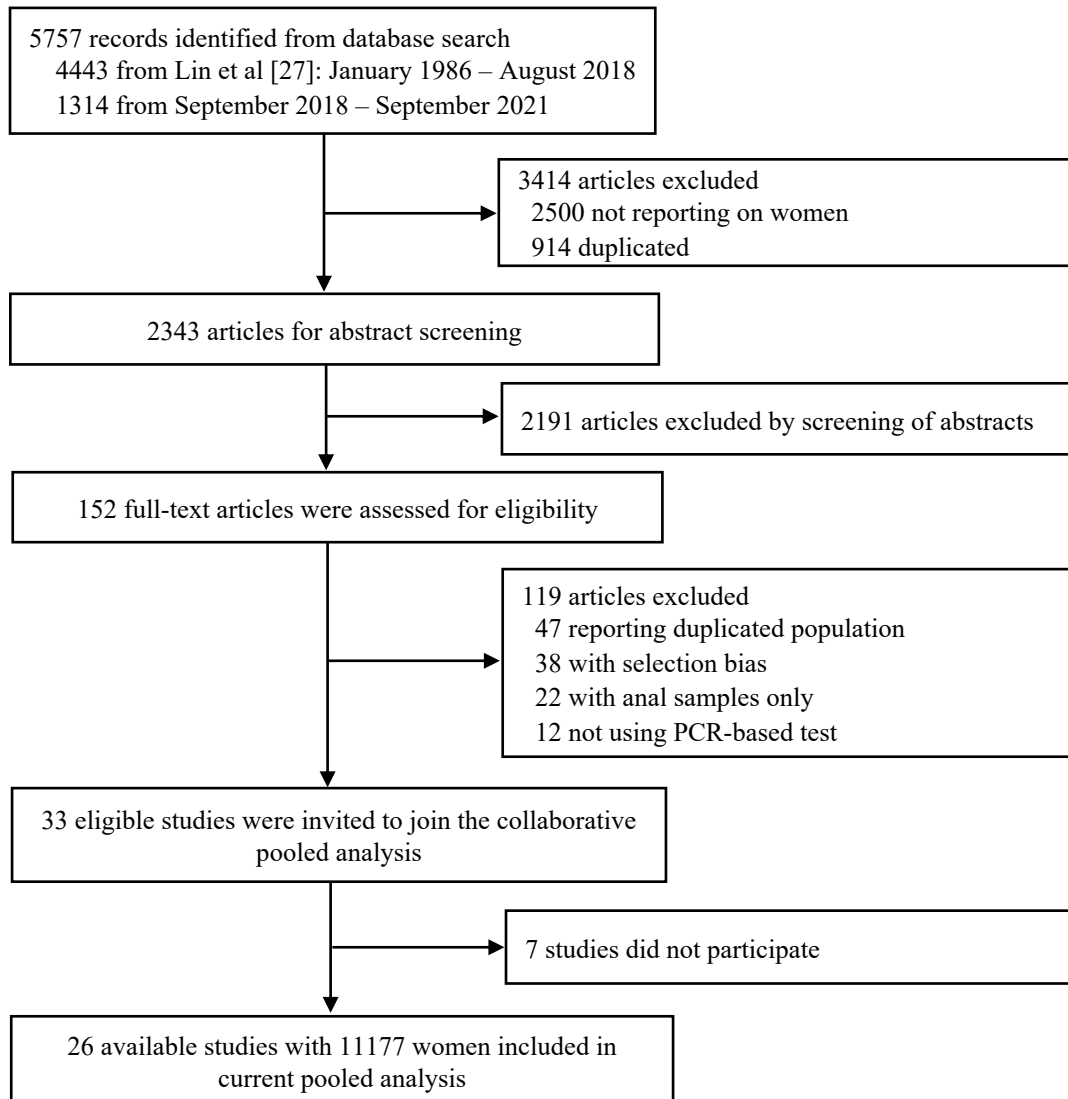

**Supplementary Figure S2.** Age-specific prevalence of anal and cervical non-16 HR-HPV infection in HIV-negative women and women with HIV. Error bar=95% CI. Significant PRs relative to the reference group are shown in bold. Abbreviation: PR, prevalence ratio; HR-HPV, high-risk human papillomavirus.

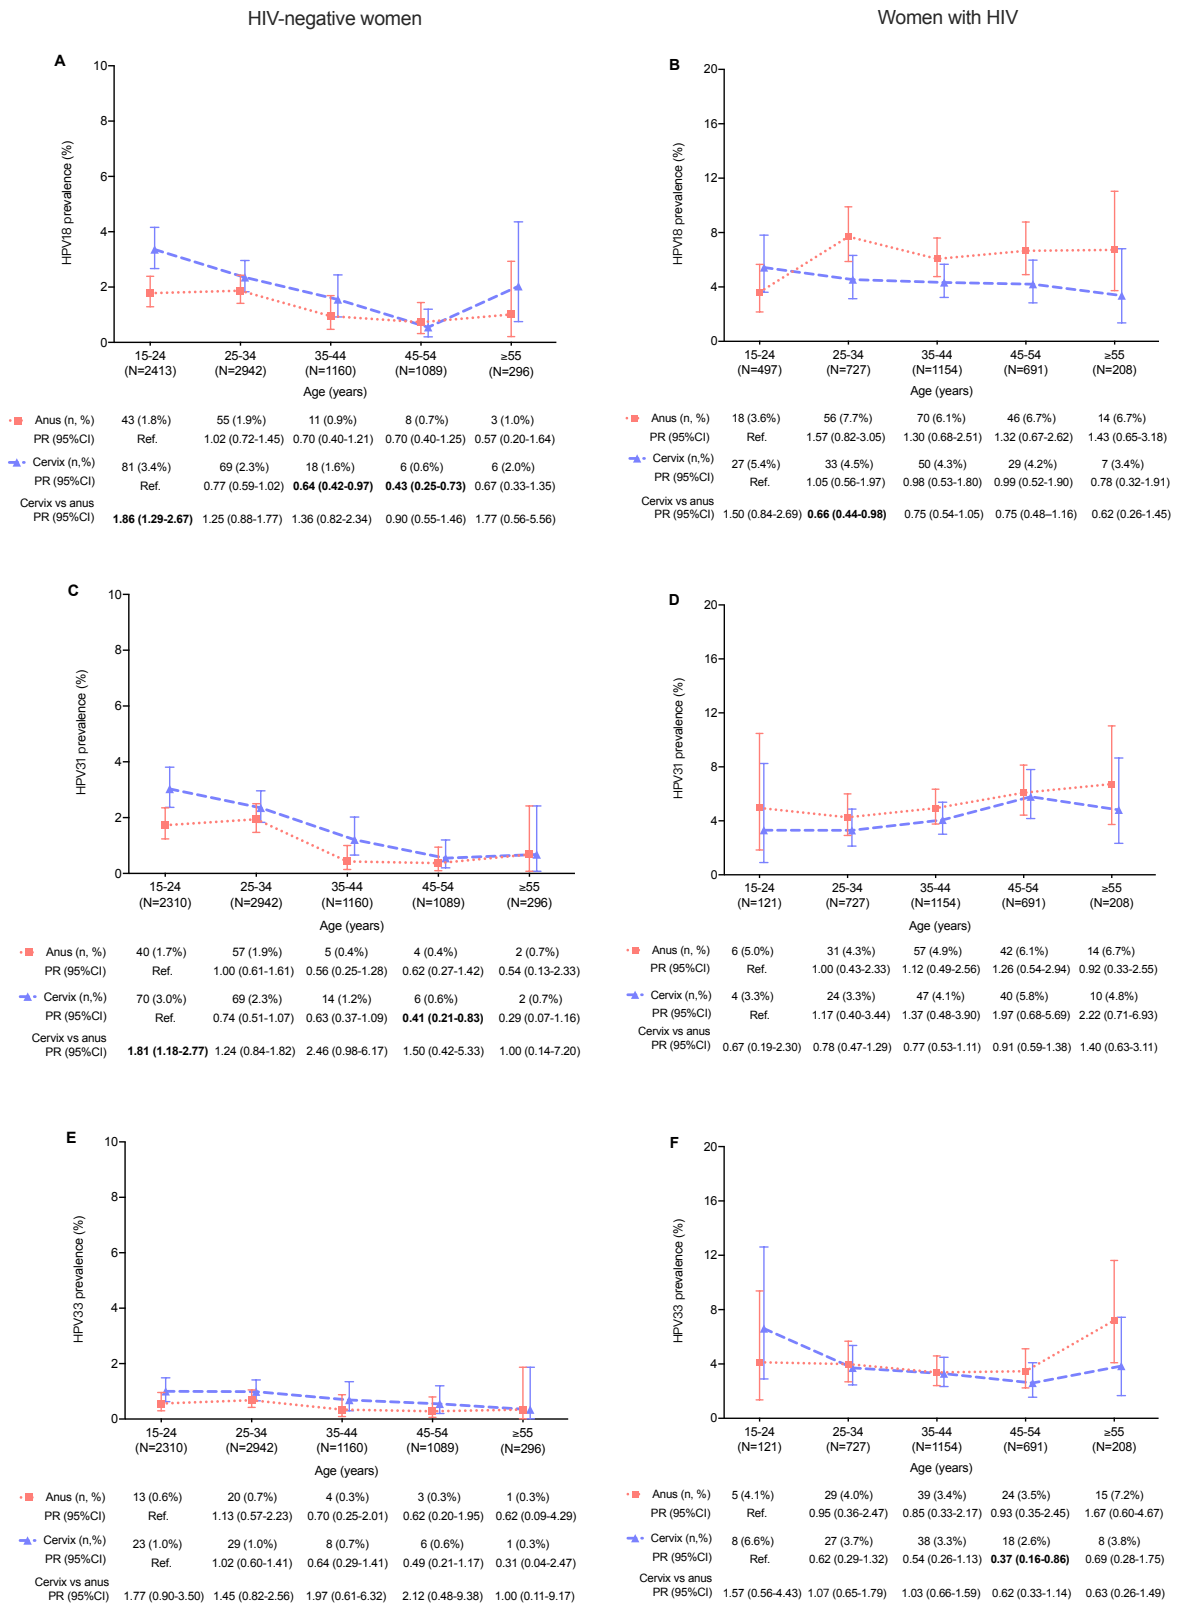

HIV-negative women

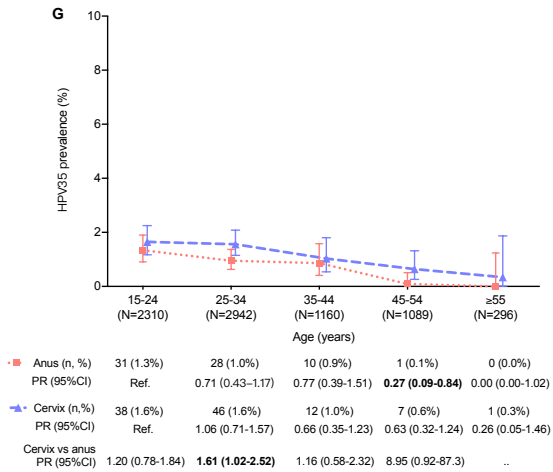

Women with HIV

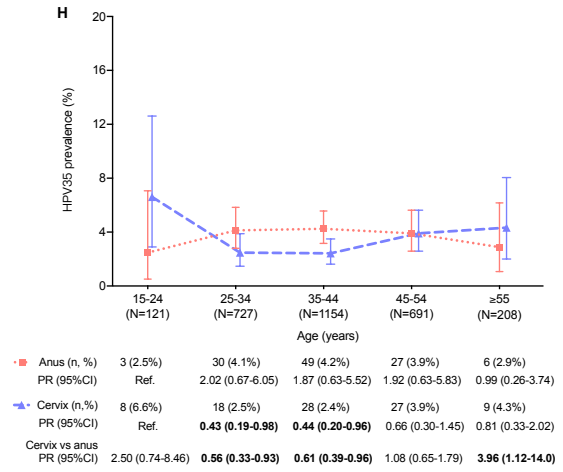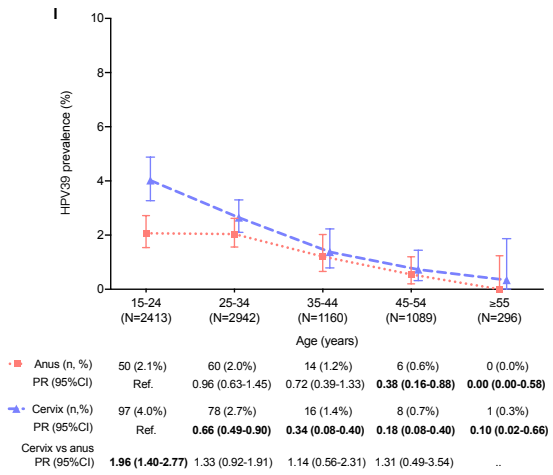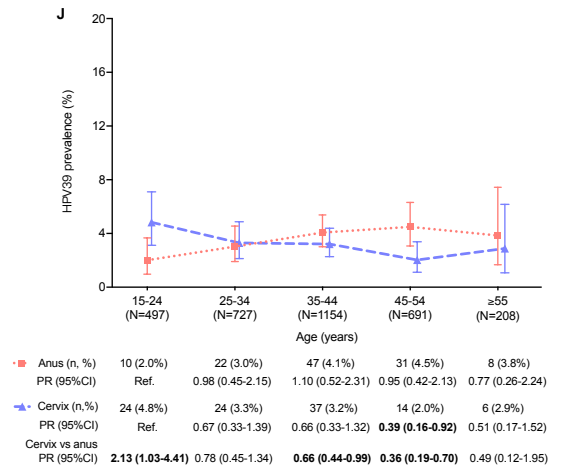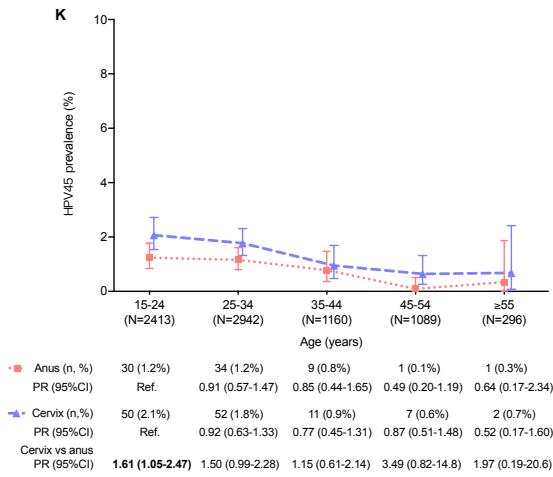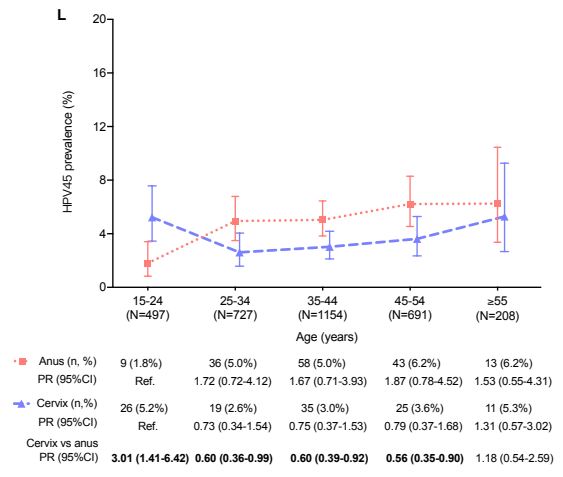

HIV-negative women

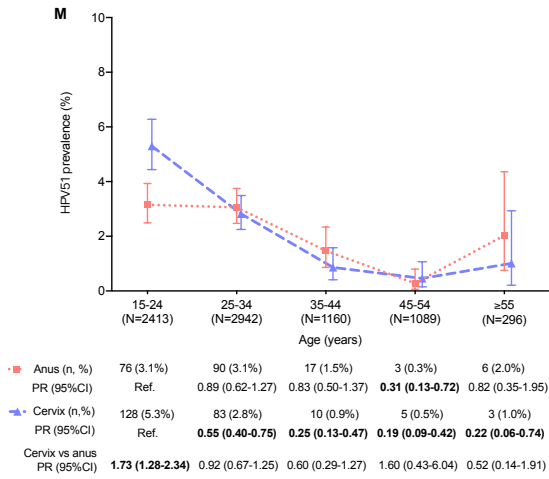

Women with HIV

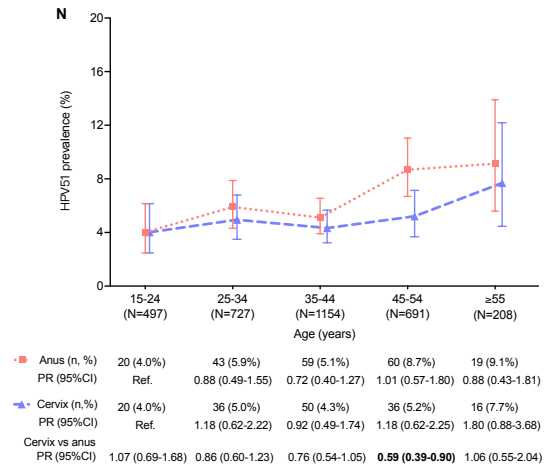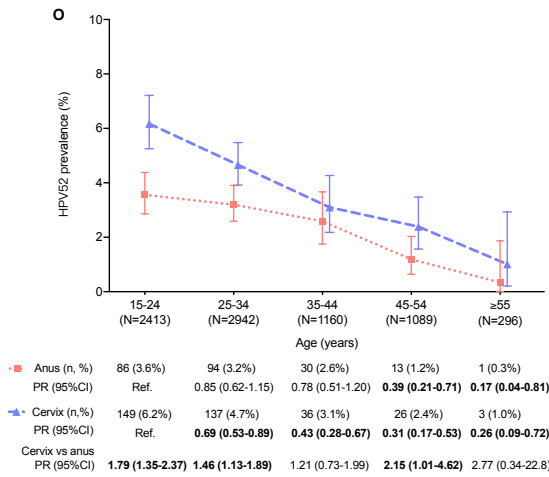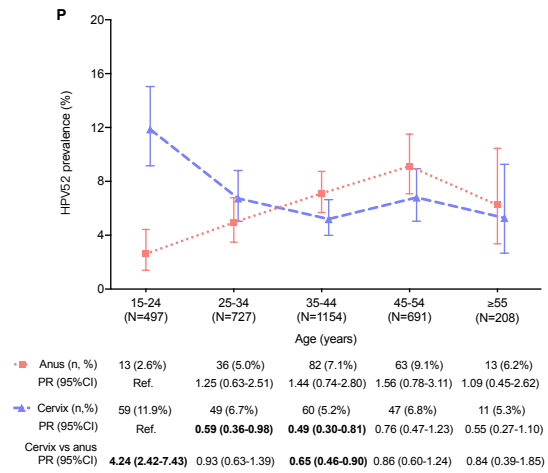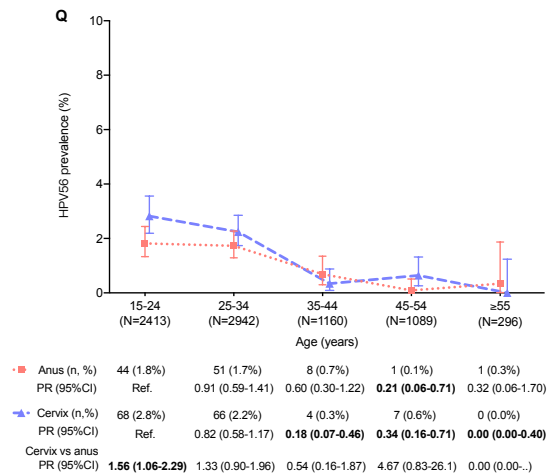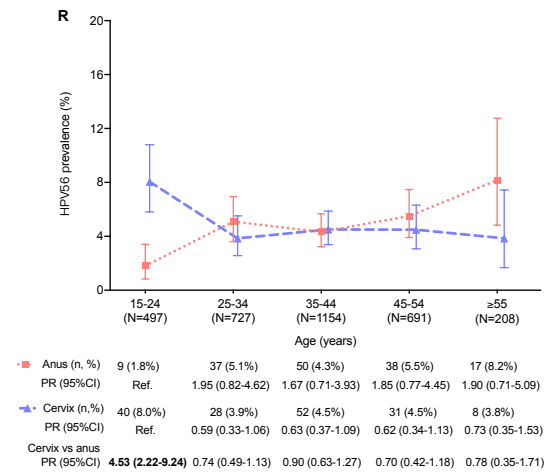

HIV-negative women

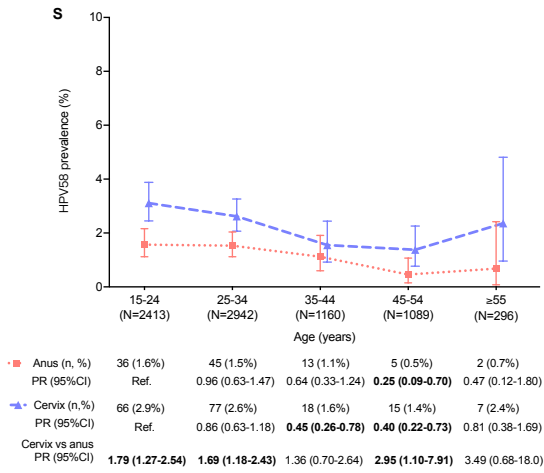

Women with HIV

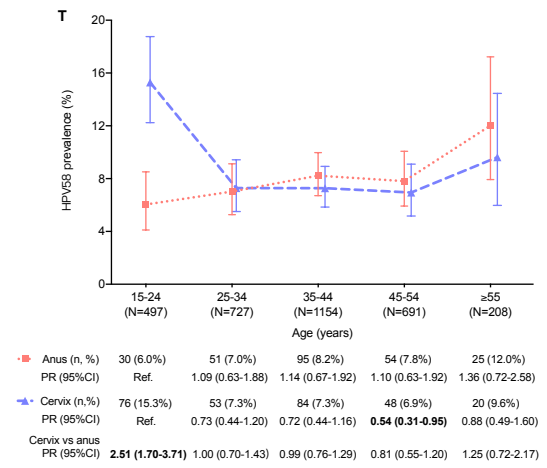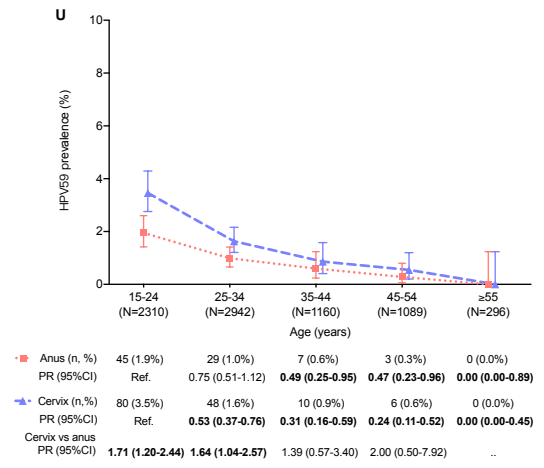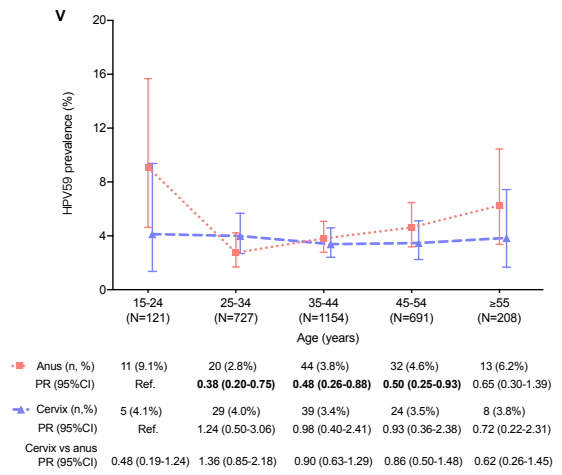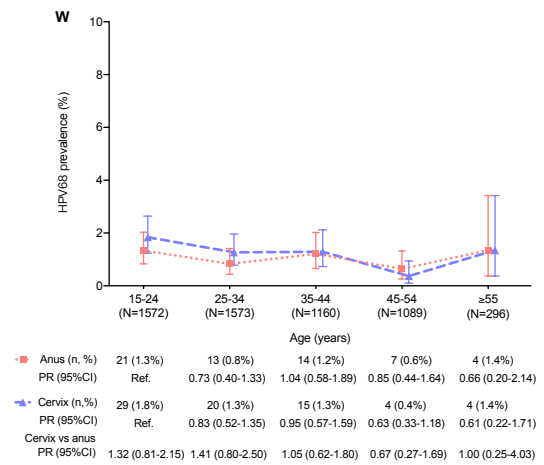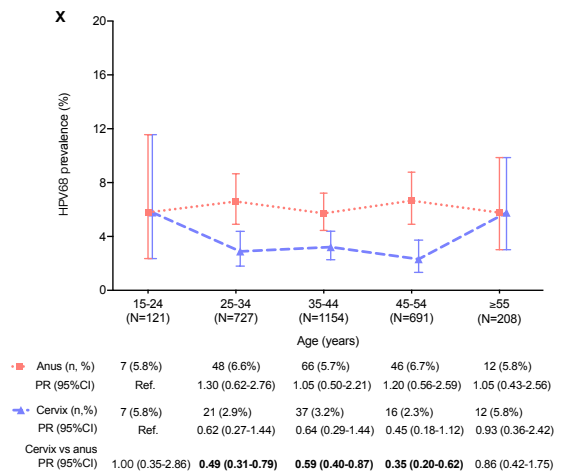



**Supplementary Figure S3.** Age-specific prevalence of anal and cervical 2v-, 4v-, and 9v-HPV infection in HIV-negative women and women with HIV. Error bar=95% CI. Significant PRs relative to the reference group are shown in bold. Abbreviations: HPV, human papillomavirus; 2v-HPV: HPV16 and 18; 4v-HPV: HPV6, 11, 16, and 18; 9v-HPV: HPV6, 11, 16, 18, 31, 33, 45, 52, and 58; PR, prevalence ratio.

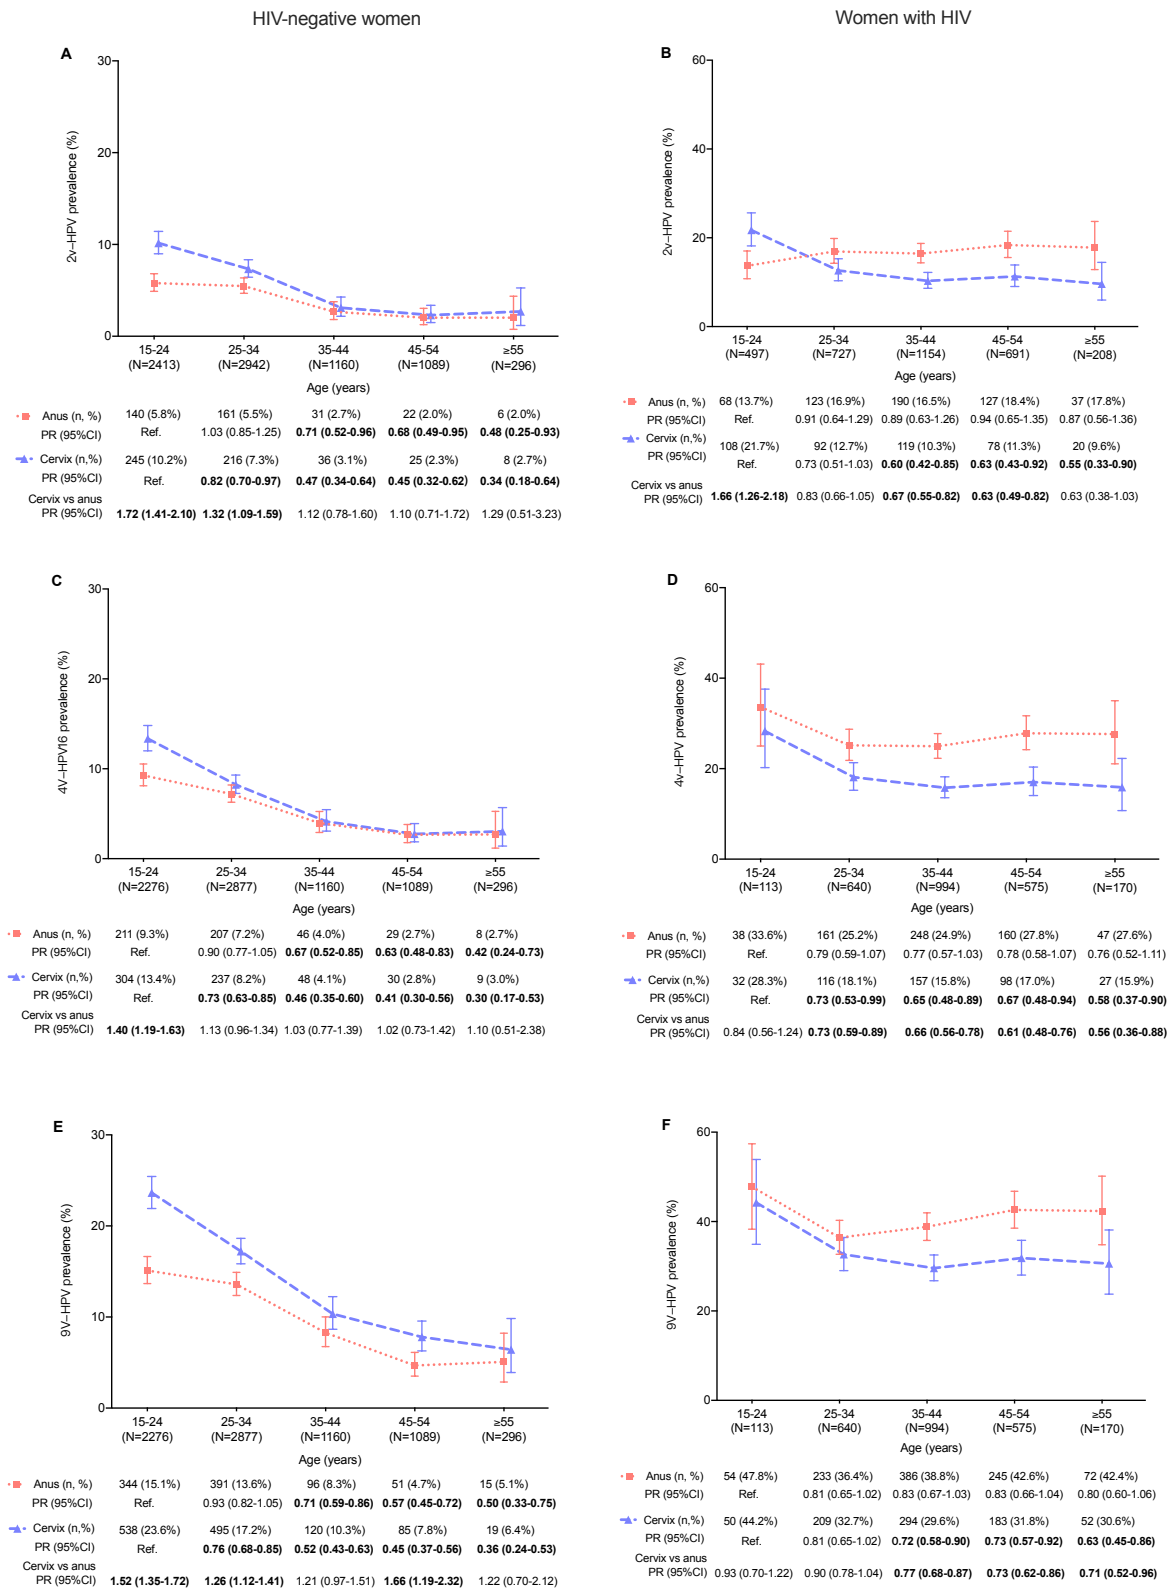

**Supplementary Figure S4.** Percentage of women with HIV according to current CD4 and age group.

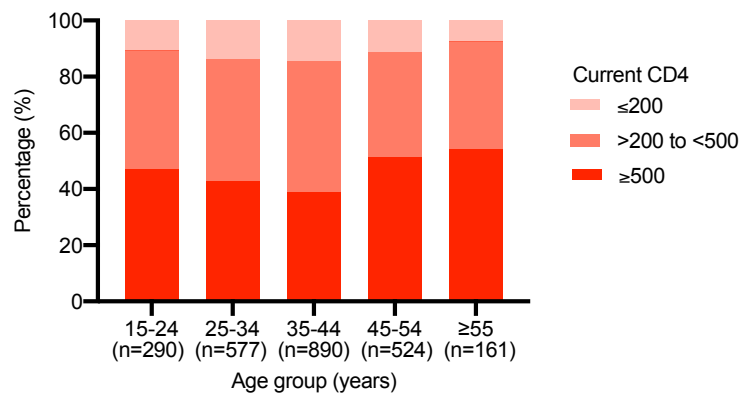

**Supplementary Figure S5.** Combination of cervical and anal non-HPV16 prevalence in HIV-negative women and women with HIV, according to age group. \*Concurrent cervical HPV infection in all women with anal HPV infection.

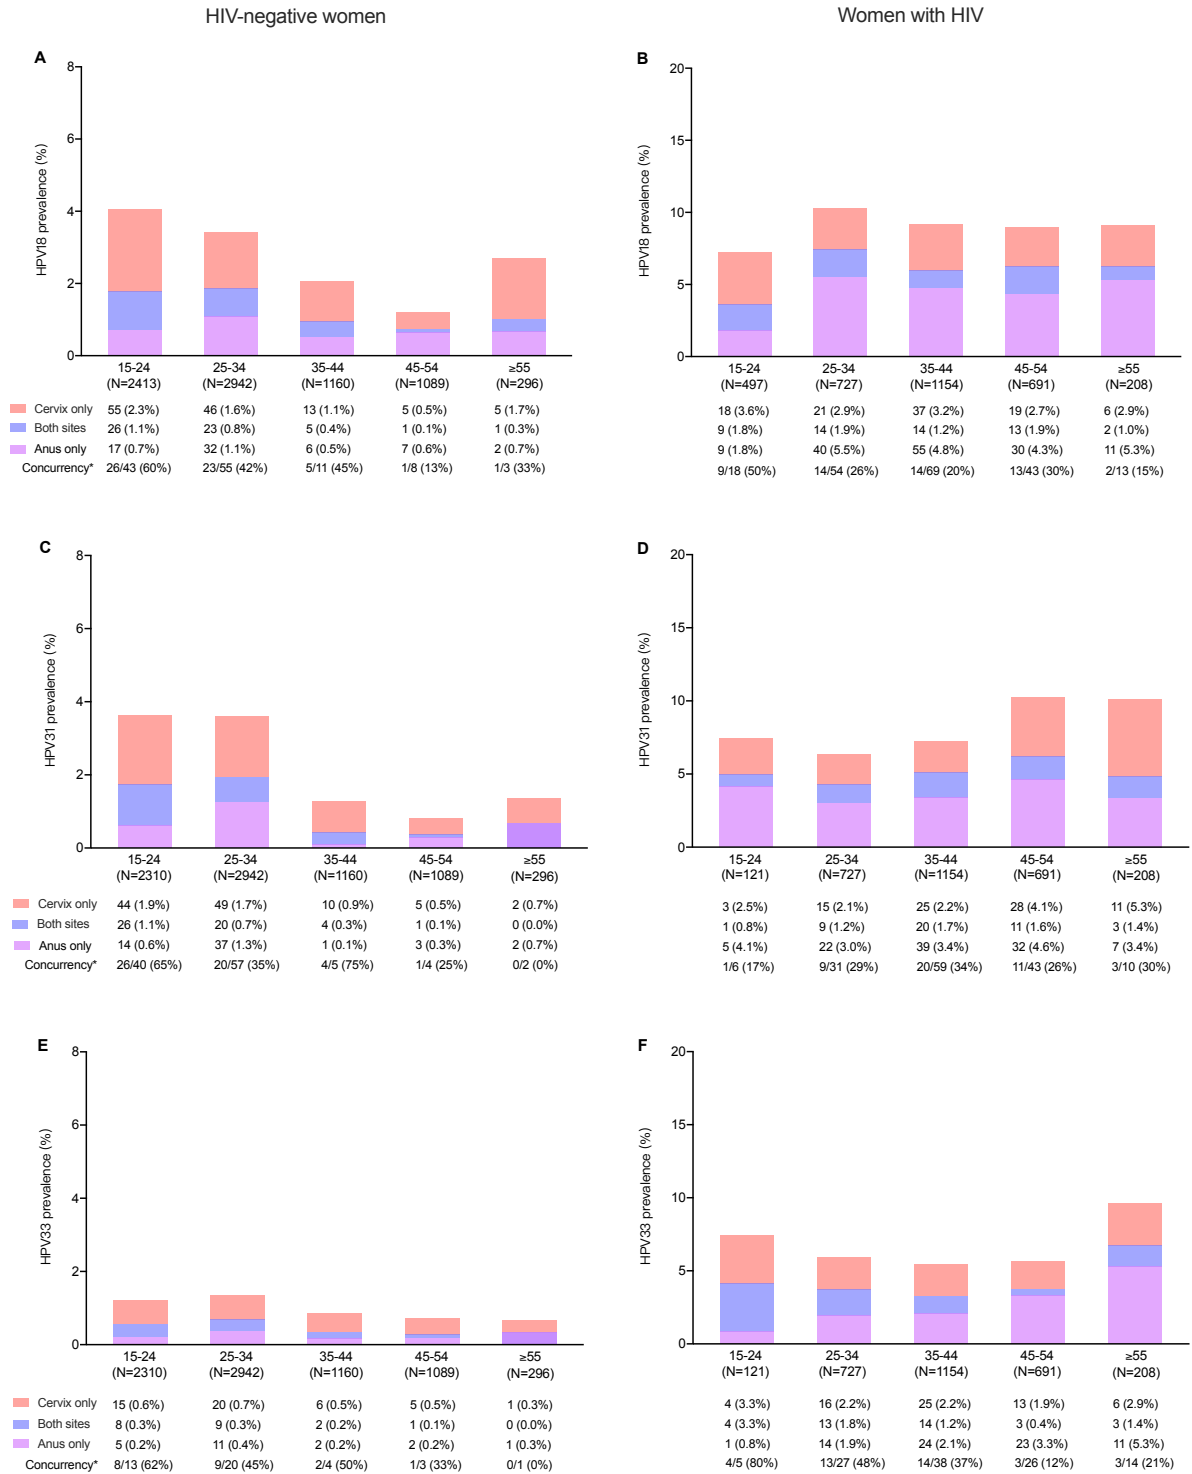

HIV-negative women

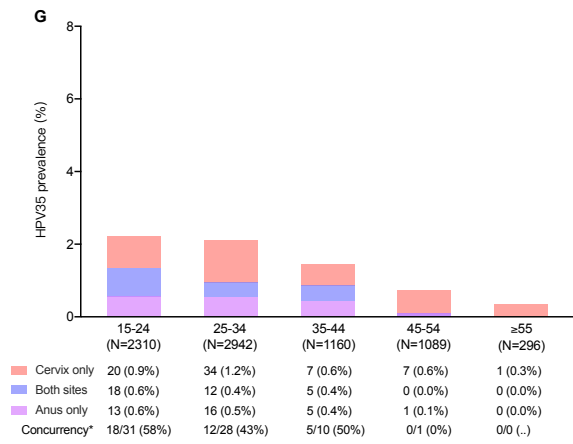

Women with HIV

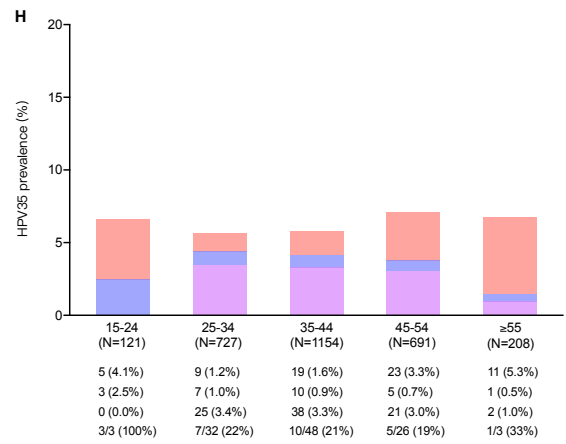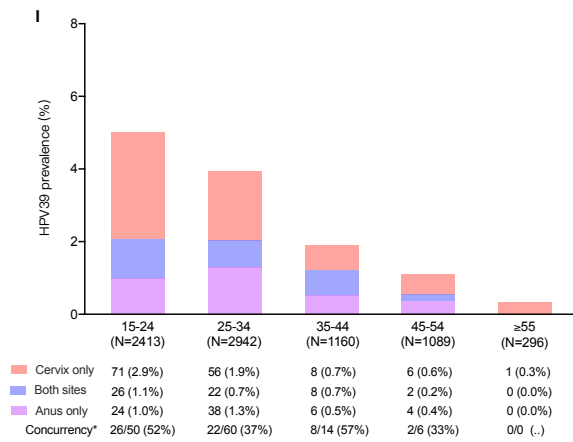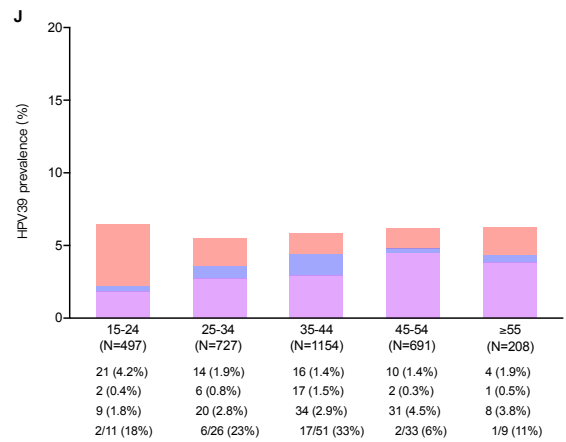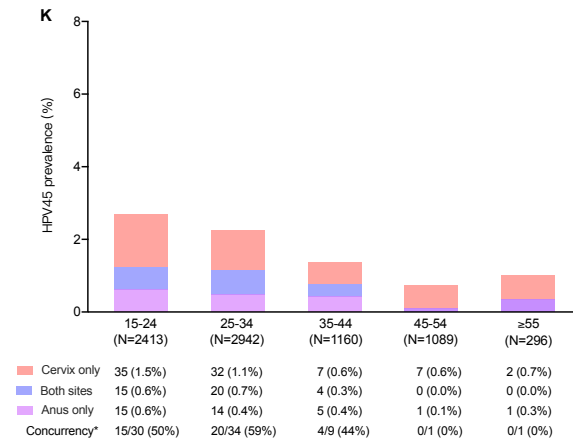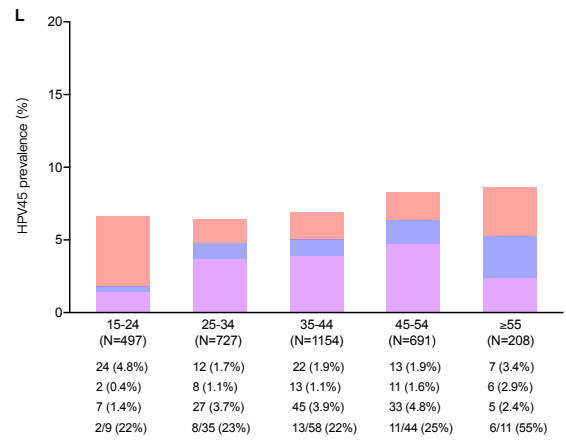

HIV-negative women

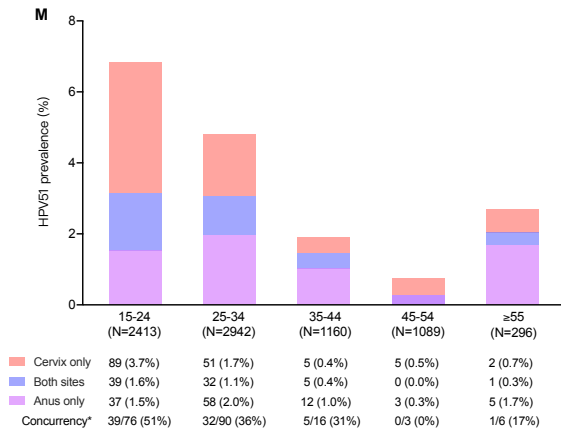

Women with HIV

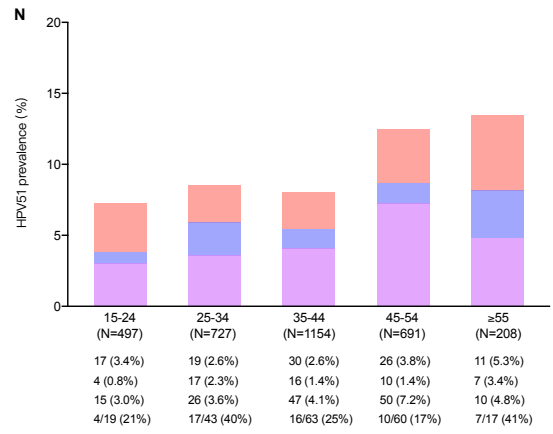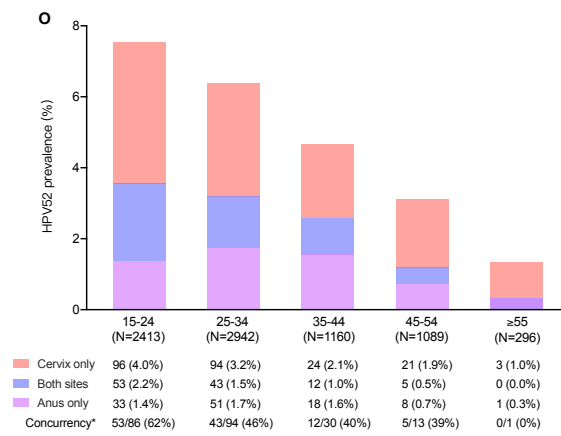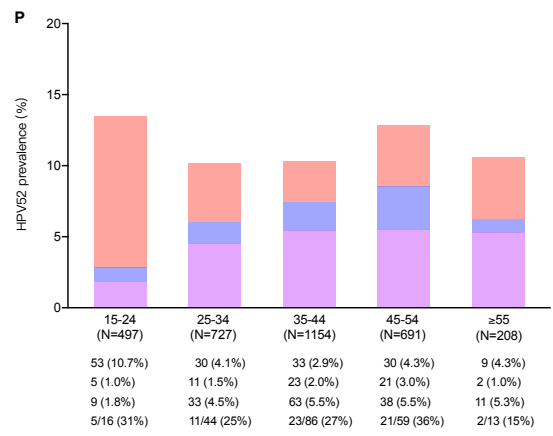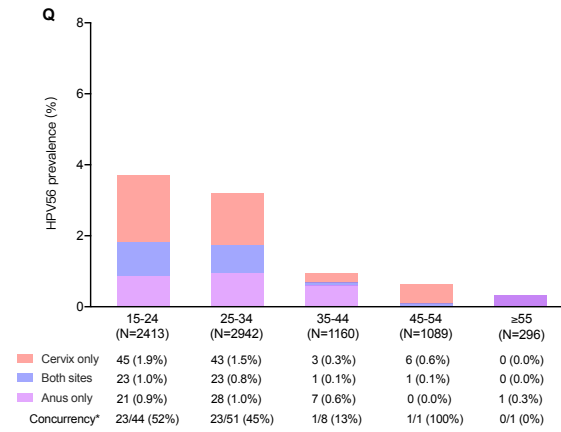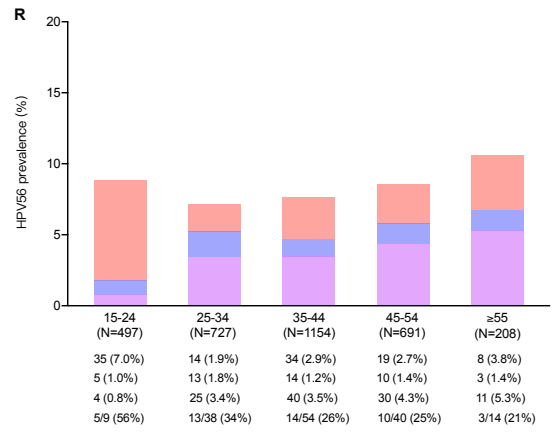

HIV-negative women

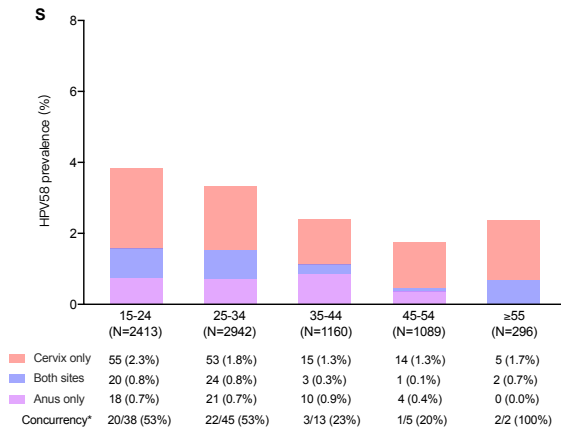

Women with HIV

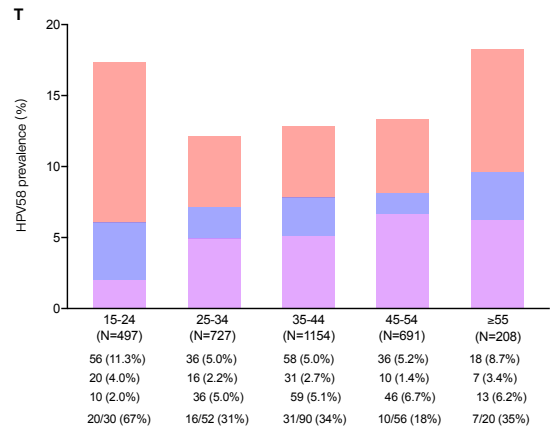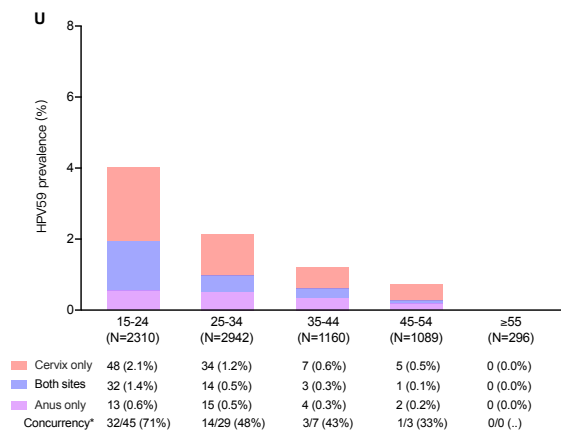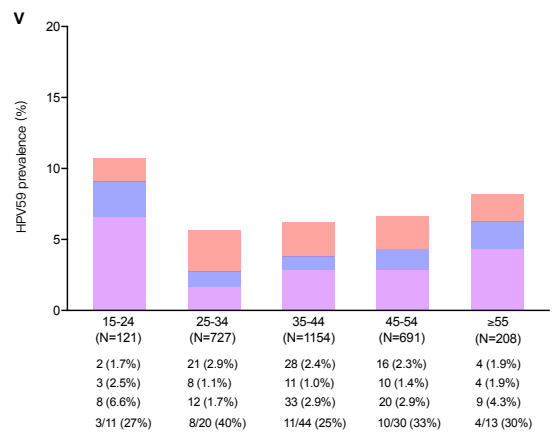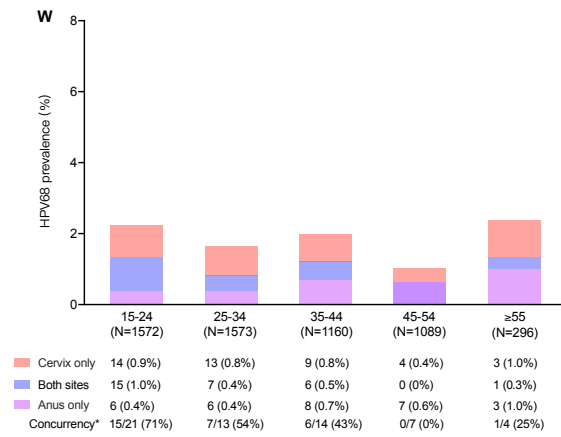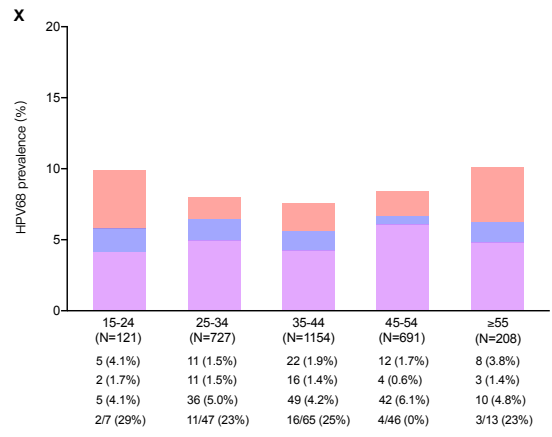

## References

1. Duan R, Zhang H, Wu A, et al. Prevalence and risk factors for anogenital HPV infection and neoplasia among women living with HIV in China. *Sex Transm Infect* **2021**.
2. Morhason-Bello IO, Baisley K, Pavon MA, et al. Prevalence and genotype specific concordance of oro-genital and anal human papillomavirus infections among sexually active Nigerian women. *Infect Agent Cancer* **2021**; 16:59.
3. Rodrigues LLS, Hardick J, Nicol AF, et al. Sexually transmitted infections among HIV-infected and HIV-uninfected women in the Tapajos region, Amazon, Brazil: Self-collected vs. clinician-collected samples. *PLoS One* **2019**; 14:e0215001.
4. de Pokomandy A, Kaufman E, de Castro C, et al. The EVVA Cohort Study: Anal and Cervical Type-Specific Human Papillomavirus Prevalence, Persistence, and Cytologic Findings in Women Living With HIV. *J Infect Dis* **2017**; 216:447-56.
5. Dube Mandishora RS, Christiansen IK, Chin'ombe N, et al. Genotypic diversity of anogenital human papillomavirus in women attending cervical cancer screening in Harare, Zimbabwe. *J Med Virol* **2017**; 89:1671-7.
6. Wei F, Li M, Wu X, et al. The prevalence and concordance of human papillomavirus infection in different anogenital sites among men and women in Liuzhou, China: A population-based study. *Int J Cancer* **2018**; 142:1244-51.
7. Heard I, Poizot-Martin I, Potard V, et al. Prevalence of and Risk Factors for Anal Oncogenic Human Papillomavirus Infection Among HIV-Infected Women in France in the Combination Antiretroviral Therapy Era. *J Infect Dis* **2016**; 213:1455-61.
8. Menezes LJ, Poongulali S, Tommasino M, et al. Prevalence and concordance of human papillomavirus infection at multiple anatomic sites among HIV-infected women from Chennai, India. *Int J STD AIDS* **2016**; 27:543-53.
9. Ortiz AP, Romaguera J, Perez CM, et al. Prevalence, genotyping, and correlates of anogenital HPV infection in a population-based sample of women in Puerto Rico. *Papillomavirus Res* **2016**; 2:89-96.
10. Cambou MC, Luz PM, Lake JE, et al. Anal human papillomavirus (HPV) prevalences and factors associated with abnormal anal cytology in HIV-infected women in an urban cohort from Rio de Janeiro, Brazil. *AIDS Patient Care STDS* **2015**; 29:4-12.
11. Ramautarsing RA, Phanuphak N, Chaithongwongwatthana S, et al. Cervical and anal HPV infection: cytological and histological abnormalities in HIV-infected women in Thailand. *J Virus Erad* **2015**; 1:96-102.
12. Tso FK, Rodrigues CL, Levi JE, Mattosinho de Castro Ferraz MG, Speck NM, Ribalta JC. HPV infection-associated anogenital cyto-colpo-histological findings and molecular typing in HIV-positive women. *Genet Mol Res* **2015**; 14:17630-40.

13. Godbole SV, Mane AK, Chidrawar SR, et al. Prevalence of anal human papillomavirus infection among HIV-infected women from India. *J Acquir Immune Defic Syndr* **2014**; 67:e111-4.
14. Kojic EM, Kang M, Cespedes MS, et al. Immunogenicity and safety of the quadrivalent human papillomavirus vaccine in HIV-1-infected women. *Clin Infect Dis* **2014**; 59:127-35.
15. Moscicki AB, Ma Y, Farhat S, et al. Natural history of anal human papillomavirus infection in heterosexual women and risks associated with persistence. *Clin Infect Dis* **2014**; 58:804-11.
16. Remis RS, Liu J, Loutfy M, et al. The epidemiology of sexually transmitted co-infections in HIV-positive and HIV-negative African-Caribbean women in Toronto. *BMC Infect Dis* **2013**; 13:550.
17. Hernandez BY, Ka'opua LS, Scanlan L, et al. Cervical and anal human papillomavirus infection in adult women in American Samoa. *Asia Pac J Public Health* **2013**; 25:19-31.
18. Hessol NA, Holly EA, Efird JT, et al. Concomitant anal and cervical human papillomavirus V infections and intraepithelial neoplasia in HIV-infected and uninfected women. *AIDS* **2013**; 27:1743-51.
19. Mullins TL, Wilson CM, Rudy BJ, Sucharew H, Kahn JA. Incident anal human papillomavirus and human papillomavirus-related sequelae in HIV-infected versus HIV-uninfected adolescents in the United States. *Sex Transm Dis* **2013**; 40:715-20.
20. Ortiz AP, Romaguera J, Perez CM, et al. Human papillomavirus infection in women in Puerto Rico: agreement between physician-collected and self-collected anogenital specimens. *J Low Genit Tract Dis* **2013**; 17:210-7.
21. Castro FA, Quint W, Gonzalez P, et al. Prevalence of and risk factors for anal human papillomavirus infection among young healthy women in Costa Rica. *J Infect Dis* **2012**; 206:1103-10.
22. Kojic EM, Cu-Uvin S, Conley L, et al. Human papillomavirus infection and cytologic abnormalities of the anus and cervix among HIV-infected women in the study to understand the natural history of HIV/AIDS in the era of effective therapy (the SUN study). *Sex Transm Dis* **2011**; 38:253-9.
23. Goncalves MA, Randi G, Arslan A, et al. HPV type infection in different anogenital sites among HIV-positive Brazilian women. *Infect Agent Cancer* **2008**; 3:5.
24. Hernandez BY, McDuffie K, Zhu X, et al. Anal human papillomavirus infection in women and its relationship with cervical infection. *Cancer Epidemiol Biomarkers Prev* **2005**; 14:2550-6.
25. Moscicki AB, Durako SJ, Houser J, et al. Human papillomavirus infection and abnormal cytology of the anus in HIV-infected and uninfected adolescents. *AIDS* **2003**; 17:311-20.
26. Palefsky JM, Holly EA, Ralston ML, Da Costa M, Greenblatt RM. Prevalence and risk factors for anal human papillomavirus infection in human immunodeficiency virus (HIV)-positive and high-risk HIV-negative women. *J Infect Dis* **2001**; 183:383-91.
27. Lin C, Slama J, Gonzalez P, et al. Cervical determinants of anal HPV infection and high-grade anal lesions in women: a collaborative pooled analysis. *Lancet Infect Dis* **2019**; 19:880-91.
